# Supplementary material for: COVID-19 Vaccine Concerns about Safety, Effectiveness, and Policies in the United States, Canada, Sweden, and Italy among Unvaccinated Individuals
Source: Vaccines (Basel). 2021 Oct 6;9(10):1138. doi: 10.3390/vaccines9101138 (PMC8538553; doi:10.3390/vaccines9101138)
Supplement: Supplementary file 1 [file vaccines-09-01138-s001.zip › vaccines-1395511-supplementary.pdf]

## Supplementary Material – Confirmatory Factor Analysis

| <i>Item</i>                                                                                                                                           | <i>Factor Loading</i> |        |
|-------------------------------------------------------------------------------------------------------------------------------------------------------|-----------------------|--------|
| <b><i>Vaccine Safety and Government Control – Factor 1</i></b>                                                                                        |                       |        |
| 1. You can get COVID-19 from the vaccine itself (R)                                                                                                   | 0.6668                |        |
| 2. There are toxic ingredients in the vaccine that can harm your health (R)                                                                           | 0.7663                |        |
| 3. The vaccine can mess up your DNA (R)                                                                                                               | 0.7268                |        |
| 4. The vaccine can cause infertility (R)                                                                                                              | 0.7359                |        |
| 5. The vaccine can cause other diseases (R)                                                                                                           | 0.7356                |        |
| 6. The fast production of the vaccine compromised its safety (R)                                                                                      | 0.6907                |        |
| 7. The vaccine is going to be used by Governments as a tool to limit our civil rights (right of assembly, right of movement, right of religion, etc.) | 0.6808                |        |
|                                                                                                                                                       |                       |        |
| <i>Item</i>                                                                                                                                           | <i>Factor Loading</i> |        |
| <b><i>Vaccine Effectiveness and Population Control – Factor 1</i></b>                                                                                 |                       |        |
| 8. The vaccine will work in protecting me from getting COVID-19                                                                                       | 0.7406                |        |
| 9. By taking the vaccine I will protect my friends and family from getting COVID-19                                                                   | 0.7926                |        |
| 10. Everyone should get the vaccine to achieve herd immunity                                                                                          | 0.8098                |        |
| 11. Getting COVID-19 is worse than experiencing potential side effects from the vaccine                                                               | 0.6863                |        |
| 12. Natural remedies will not protect me from COVID-19                                                                                                | 0.6385                |        |
|                                                                                                                                                       |                       |        |
| <i>Item</i>                                                                                                                                           | <i>Factor Loading</i> |        |
|                                                                                                                                                       | 1                     | 2      |
| <b><i>Freedom – Factor 1</i></b>                                                                                                                      |                       |        |
| 13. People should be free to decide if they get vaccinated or not with no consequences for their job or personal life                                 | 0.807                 |        |
| 14. People should have the option to choose the vaccine brand they want                                                                               | 0.7607                |        |
| 15. People should be allowed to live their life with no restrictions once vaccinated                                                                  | 0.437                 |        |
| 16. Healthcare professionals and scientists with concerns about the vaccine should have opportunities to share their opinions with the public         | 0.6284                |        |
| <b><i>Freedom – Factor 2</i></b>                                                                                                                      |                       |        |
| 17. Everybody should have equal access to the most effective and safe vaccine regardless of income, race, or immigration status                       |                       | 0.8364 |
| 18. There is no elite group that will achieve financial power if people are getting vaccinated                                                        |                       | 0.6319 |
| 19. There is no microchip with tracking capabilities inserted in the vaccine                                                                          |                       | 0.7415 |

## Supplementary Material – Exploratory Factor Analysis

| <i>Item</i>                                                                                                                                           | <i>Factor Loading</i> |          |          |
|-------------------------------------------------------------------------------------------------------------------------------------------------------|-----------------------|----------|----------|
|                                                                                                                                                       | <i>1</i>              | <i>2</i> | <i>3</i> |
| <b><i>Vaccine Safety and Government Control – Factor 1</i></b>                                                                                        |                       |          |          |
| 1. You can get COVID-19 from the vaccine itself (R)                                                                                                   | 0.6186                |          |          |
| 2. There are toxic ingredients in the vaccine that can harm your health (R)                                                                           | 0.7085                |          |          |
| 3. The vaccine can mess up your DNA (R)                                                                                                               | 0.609                 |          |          |
| 4. The vaccine can cause infertility (R)                                                                                                              | 0.6747                |          |          |
| 5. The vaccine can cause other diseases (R)                                                                                                           | 0.7362                |          |          |
| 6. The fast production of the vaccine compromised its safety (R)                                                                                      | 0.6288                |          |          |
| 7. The vaccine is going to be used by Governments as a tool to limit our civil rights (right of assembly, right of movement, right of religion, etc.) | 0.5471                |          |          |
| <b><i>Vaccine Effectiveness and Population Control – Factor 2</i></b>                                                                                 |                       |          |          |
| 8. The vaccine will work in protecting me from getting COVID-19                                                                                       |                       | 0.7406   |          |
| 9. By taking the vaccine I will protect my friends and family from getting COVID-19                                                                   |                       | 0.7926   |          |
| 10. Everyone should get the vaccine to achieve herd immunity                                                                                          |                       | 0.8098   |          |
| 11. Getting COVID-19 is worse than experiencing potential side effects from the vaccine                                                               |                       | 0.6863   |          |
| 12. Natural remedies will not protect me from COVID-19                                                                                                |                       | 0.6385   |          |
| 18. There is no elite group that will achieve financial power if people are getting vaccinated                                                        |                       | 0.4253   |          |
| 19. There is no microchip with tracking capabilities inserted in the vaccine                                                                          |                       | 0.6399   |          |
| 17. Everybody should have equal access to the most effective and safe vaccine regardless of income, race, or immigration status                       |                       | 0.5879   | 0.4606   |
| <b><i>Freedom – Factor 3</i></b>                                                                                                                      |                       |          |          |
| 13. People should be free to decide if they get vaccinated or not with no consequences for their job or personal life                                 |                       |          | 0.7292   |
| 14. People should have the option to choose the vaccine brand they want                                                                               |                       |          | 0.7259   |
| 15. People should be allowed to live their life with no restrictions once vaccinated                                                                  |                       |          | 0.5287   |
| 16. Healthcare professionals and scientists with concerns about the vaccine should have opportunities to share their opinions with the public         |                       |          | 0.7029   |

Supplementary Material – Mean Agreement and Standard Deviation for All Items

|                                                                                      |                                                                                                                                                                | Reason    | Overall Sample | United States |                | Canada    |           | Sweden       |           | Italy     |              |           |           |           |
|--------------------------------------------------------------------------------------|----------------------------------------------------------------------------------------------------------------------------------------------------------------|-----------|----------------|---------------|----------------|-----------|-----------|--------------|-----------|-----------|--------------|-----------|-----------|-----------|
|                                                                                      |                                                                                                                                                                |           |                | Overall       | Non-Hesitant ^ | Hesitant  | Overall   | Non-Hesitant | Hesitant  | Overall   | Non-Hesitant | Hesitant  |           |           |
| Vaccine Safety and Government Control                                                | 1. You can get COVID-19 from the vaccine itself (R) *, +, -                                                                                                    | 4.9 (2.8) | 5.3 (2.9)      | 4.1 (3)       | 6 (2.7)        | 4.2 (2.7) | 3.3 (2.5) | 5.5 (2.4)    | 5 (2.7)   | 4.4 (2.8) | 5.8 (2.4)    | 5.3 (2.8) | 4.9 (2.9) | 5.8 (2.6) |
|                                                                                      | 2. There are toxic ingredients in the vaccine that can harm your health (R) *, +, -                                                                            | 5.1 (2.6) | 5.3 (2.9)      | 4 (2.9)       | 6.1 (2.7)      | 4.8 (2.6) | 3.9 (2.4) | 6.1 (2.4)    | 5.5 (2.4) | 4.8 (2.3) | 6.3 (2.1)    | 4.7 (2.5) | 4 (2.3)   | 5.6 (2.5) |
|                                                                                      | 3. The vaccine can mess up your DNA (R) *, +, -                                                                                                                | 4.4 (2.8) | 5 (2.9)        | 3.7 (2.9)     | 5.8 (2.7)      | 4.2 (2.7) | 3.2 (2.4) | 5.4 (2.5)    | 4.5 (2.8) | 3.8 (2.9) | 5.2 (2.4)    | 4.2 (2.6) | 3.6 (2.6) | 4.9 (2.5) |
|                                                                                      | 4. The vaccine can cause infertility (R) *, +, -                                                                                                               | 4.8 (2.6) | 5.3 (2.8)      | 3.9 (2.8)     | 6.1 (2.5)      | 4.5 (2.6) | 3.6 (2.4) | 5.7 (2.3)    | 5.1 (2.4) | 4.6 (2.5) | 5.7 (2.2)    | 4.6 (2.6) | 4.1 (2.7) | 5.1 (2.3) |
|                                                                                      | 5. The vaccine can cause other diseases (R) *, -                                                                                                               | 5.3 (2.6) | 5.3 (2.9)      | 3.8 (2.9)     | 6.2 (2.6)      | 4.8 (2.6) | 4 (2.5)   | 6.1 (2.3)    | 5.8 (2.3) | 5.3 (2.3) | 6.3 (2.2)    | 5.2 (2.5) | 4.6 (2.5) | 5.9 (2.5) |
|                                                                                      | 6. The fast production of the vaccine compromised its safety (R) *, +, -                                                                                       | 5.2 (2.7) | 5.6 (3)        | 4 (3)         | 6.5 (2.7)      | 5 (2.6)   | 4.1 (2.4) | 6.3 (2.4)    | 5.5 (2.5) | 5 (2.4)   | 6.1 (2.4)    | 4.9 (2.7) | 4.3 (2.5) | 5.7 (2.6) |
|                                                                                      | 7. The vaccine is going to be used by Governments as a tool to limit our civil rights (right of assembly, right of movement, right of religion, etc.) (R) *, + | 4.9 (2.9) | 5.4 (3.1)      | 3.9 (2.9)     | 6.2 (2.8)      | 4.8 (2.9) | 3.9 (2.7) | 6 (2.6)      | 4.9 (2.7) | 4.1 (2.8) | 5.8 (2.4)    | 4.5 (2.8) | 4 (2.7)   | 5.2 (2.8) |
| Vaccine Effectiveness and Population Control                                         | 8. The vaccine will work in protecting me from getting COVID-19 *, +, -                                                                                        | 6.8 (2.7) | 6 (3.1)        | 7.7 (2.7)     | 5 (2.8)        | 7.2 (2.6) | 8.3 (2)   | 5.6 (2.6)    | 6.6 (2.6) | 7.8 (2.1) | 5.4 (2.5)    | 7.3 (2.4) | 8.2 (1.8) | 6 (2.4)   |
|                                                                                      | 9. By taking the vaccine I will protect my friends and family from getting COVID-19 *, +, -                                                                    | 7.1 (2.8) | 6.1 (3)        | 7.8 (2.7)     | 5.1 (2.8)      | 7.4 (2.7) | 8.6 (2)   | 5.7 (2.6)    | 7 (2.8)   | 8.4 (2.2) | 5.5 (2.6)    | 7.8 (2.4) | 8.7 (1.9) | 6.5 (2.5) |
|                                                                                      | 10. Everyone should get the vaccine to achieve herd immunity *, +, -                                                                                           | 7.1 (2.9) | 5.8 (3.1)      | 7.6 (2.7)     | 4.7 (2.8)      | 7.4 (2.8) | 8.8 (1.8) | 5.5 (2.8)    | 7.1 (2.7) | 8.7 (1.9) | 5.5 (2.5)    | 7.7 (2.6) | 8.8 (1.9) | 6.3 (2.6) |
|                                                                                      | 11. Getting COVID-19 is worse than experiencing potential side effects from the vaccine *, -                                                                   | 6.7 (2.8) | 5.9 (2.9)      | 7 (3.1)       | 5.3 (2.6)      | 7 (2.8)   | 8.1 (2.5) | 5.5 (2.6)    | 6.7 (2.7) | 7.9 (2.5) | 5.4 (2.3)    | 6.9 (2.7) | 7.9 (2.4) | 5.6 (2.4) |
|                                                                                      | 12. Natural remedies will not protect me from COVID-19 *, +, -                                                                                                 | 6.9 (2.8) | 6 (2.9)        | 7.2 (2.9)     | 5.3 (2.6)      | 7.1 (2.8) | 7.9 (2.6) | 5.9 (2.6)    | 6.9 (2.7) | 7.8 (2.7) | 5.9 (2.5)    | 7.4 (2.6) | 8.1 (2.4) | 6.6 (2.4) |
|                                                                                      | 17. Everybody should have equal access to the most effective and safe vaccine regardless of income, race, or immigration status *, +, -                        | 8 (2.3)   | 7 (2.5)        | 7.3 (2.5)     | 6.8 (2.4)      | 8 (2.3)   | 8.7 (1.8) | 7.1 (2.6)    | 8.1 (2.4) | 8.9 (1.9) | 7.3 (2.6)    | 8.6 (2)   | 9 (1.8)   | 8 (2.1)   |
|                                                                                      | 18. There is no elite group that will achieve financial power if people are getting vaccinated *, -                                                            | 6.1 (2.7) | 5.9 (2.7)      | 7 (2.5)       | 5.2 (2.6)      | 6.1 (2.7) | 6.7 (2.6) | 5.3 (2.7)    | 6.6 (2.7) | 7.5 (2.5) | 5.5 (2.5)    | 6 (2.7)   | 6.5 (2.7) | 5.3 (2.6) |
| 19. There is no microchip with tracking capabilities inserted in the vaccine *, +, - | 7.3 (2.6)                                                                                                                                                      | 6.2 (2.6) | 7.2 (2.4)      | 5.6 (2.5)     | 7.5 (2.5)      | 8.3 (2.1) | 6.4 (2.6) | 7.3 (2.7)    | 8.4 (2.4) | 6.2 (2.6) | 7.9 (2.4)    | 8.6 (2.1) | 7.1 (2.4) |           |
| Freedom                                                                              | 13. People should be free to decide if they get vaccinated or not with no consequences for their job or personal life *, +, -                                  | 6.3 (2.8) | 6.8 (2.6)      | 6.8 (2.6)     | 6.9 (2.5)      | 6.1 (2.9) | 5.4 (2.9) | 6.9 (2.7)    | 6.4 (2.8) | 6 (2.9)   | 6.9 (2.6)    | 6.2 (2.9) | 5.2 (2.9) | 7.4 (2.5) |
|                                                                                      | 14. People should have the option to choose the vaccine brand they want *, +, -                                                                                | 7.1 (2.5) | 7.2 (2.3)      | 7.5 (2.3)     | 7 (2.3)        | 7.1 (2.4) | 7.3 (2.2) | 6.9 (2.6)    | 6.8 (2.7) | 6.6 (2.6) | 7 (2.7)      | 7.3 (2.6) | 7 (2.8)   | 7.6 (2.3) |
|                                                                                      | 15. People should be allowed to live their life with no restrictions once vaccinated *, +, -                                                                   | 6.7 (2.5) | 6.6 (2.5)      | 7.1 (2.6)     | 6.3 (2.4)      | 6.5 (2.6) | 6.7 (2.5) | 6.3 (2.6)    | 6.5 (2.5) | 6.9 (2.3) | 6.1 (2.5)    | 7.2 (2.4) | 7.5 (2.3) | 7 (2.5)   |
|                                                                                      | 16. Healthcare professionals and scientists with concerns about the vaccine should have opportunities to share their opinions with the public *, +, -          | 7.2 (2.4) | 6.9 (2.4)      | 7.2 (2.4)     | 6.8 (2.4)      | 7.4 (2.3) | 7.6 (2.1) | 7.1 (2.4)    | 7.2 (2.4) | 7.6 (2.2) | 6.9 (2.5)    | 7.1 (2.5) | 6.9 (2.6) | 7.5 (2.4) |

Key:  
\* KW test by country is significant for overall sample  
+ KW test by country is significant for hesitant sample  
- KW test by country is significant for non-hesitant sample  
^ Repeated measures model did not indicate that the means for Vaccine Safety and Government Control were significantly different among this sub-sample

Supplementary Material – Additional Psychometric Analyses

Correlation Matrix of Items by Subscale

| Item                                                                                                                                                  | 1      | 2      | 3      | 4      | 5      | 6      | 7      | 8      | 9      | 10    | 11     | 12     | 17    | 18     | 19     | 13    | 14    | 15    | 16 |
|-------------------------------------------------------------------------------------------------------------------------------------------------------|--------|--------|--------|--------|--------|--------|--------|--------|--------|-------|--------|--------|-------|--------|--------|-------|-------|-------|----|
| 1. You can get COVID-19 from the vaccine itself (R)                                                                                                   | –      |        |        |        |        |        |        |        |        |       |        |        |       |        |        |       |       |       |    |
| 2. There are toxic ingredients in the vaccine that can harm your health (R)                                                                           | 0.44*  | –      |        |        |        |        |        |        |        |       |        |        |       |        |        |       |       |       |    |
| 3. The vaccine can mess up your DNA (R)                                                                                                               | 0.41*  | 0.46*  | –      |        |        |        |        |        |        |       |        |        |       |        |        |       |       |       |    |
| 4. The vaccine can cause infertility (R)                                                                                                              | 0.42*  | 0.48*  | 0.48*  | –      |        |        |        |        |        |       |        |        |       |        |        |       |       |       |    |
| 5. The vaccine can cause other diseases (R)                                                                                                           | 0.41*  | 0.52*  | 0.43*  | 0.46*  | –      |        |        |        |        |       |        |        |       |        |        |       |       |       |    |
| 6. The fast production of the vaccine compromised its safety (R)                                                                                      | 0.35*  | 0.47*  | 0.4*   | 0.42*  | 0.43*  | –      |        |        |        |       |        |        |       |        |        |       |       |       |    |
| 7. The vaccine is going to be used by Governments as a tool to limit our civil rights (right of assembly, right of movement, right of religion, etc.) | 0.35*  | 0.43*  | 0.44*  | 0.4*   | 0.4*   | 0.4*   | –      |        |        |       |        |        |       |        |        |       |       |       |    |
| 8. The vaccine will work in protecting me from getting COVID-19                                                                                       | 0.41*  | 0.46*  | 0.43*  | 0.41*  | 0.41*  | 0.41*  | 0.41*  | –      |        |       |        |        |       |        |        |       |       |       |    |
| 9. By taking the vaccine I will protect my friends and family from getting COVID-19                                                                   | 0.37*  | 0.44*  | 0.43*  | 0.41*  | 0.38*  | 0.39*  | 0.42*  | 0.7*   | –      |       |        |        |       |        |        |       |       |       |    |
| 10. Everyone should get the vaccine to achieve herd immunity                                                                                          | 0.36*  | 0.46*  | 0.45*  | 0.42*  | 0.39*  | 0.42*  | 0.43*  | 0.68*  | 0.72*  | –     |        |        |       |        |        |       |       |       |    |
| 11. Getting COVID-19 is worse than experiencing potential side effects from the vaccine                                                               | 0.34*  | 0.38*  | 0.38*  | 0.37*  | 0.35*  | 0.36*  | 0.36*  | 0.53*  | 0.54*  | 0.58* | –      |        |       |        |        |       |       |       |    |
| 12. Natural remedies will not protect me from COVID-19                                                                                                | 0.31*  | 0.34*  | 0.38*  | 0.34*  | 0.3*   | 0.32*  | 0.36*  | 0.46*  | 0.47*  | 0.49* | 0.45*  | –      |       |        |        |       |       |       |    |
| 17. Everybody should have equal access to the most effective and safe vaccine regardless of income, race, or immigration status                       | 0.22*  | 0.18*  | 0.28*  | 0.26*  | 0.16*  | 0.19*  | 0.26*  | 0.35*  | 0.42*  | 0.4*  | 0.35*  | 0.36*  | –     |        |        |       |       |       |    |
| 18. There is no elite group that will achieve financial power if people are getting vaccinated                                                        | 0.29*  | 0.33*  | 0.34*  | 0.3*   | 0.29*  | 0.3*   | 0.34*  | 0.38*  | 0.37*  | 0.41* | 0.36*  | 0.31*  | 0.25* | –      |        |       |       |       |    |
| 19. There is no microchip with tracking capabilities inserted in the vaccine                                                                          | 0.35*  | 0.36*  | 0.43*  | 0.38*  | 0.3*   | 0.29*  | 0.36*  | 0.48*  | 0.49*  | 0.5*  | 0.44*  | 0.45*  | 0.44* | 0.36*  | –      |       |       |       |    |
| 13. People should be free to decide if they get vaccinated or not with no consequences for their job or personal life                                 | -0.06* | -0.14* | -0.08* | -0.06* | -0.08* | -0.11* | -0.12* | -0.14* | -0.13* | -0.2* | -0.11* | -0.08* | 0.11* | -0.01* | -0.04* | –     |       |       |    |
| 14. People should have the option to choose the vaccine brand they want                                                                               | 0.02   | -0.02  | 0.03   | 0.02   | -0.01  | -0.01  | 0.01   | 0.05*  | 0.06*  | 0.03* | 0.05*  | 0.09*  | 0.3*  | 0.03   | 0.12*  | 0.36* | –     |       |    |
| 15. People should be allowed to live their life with no restrictions once vaccinated                                                                  | 0.15*  | 0.15*  | 0.15*  | 0.13*  | 0.13*  | 0.12*  | 0.1*   | 0.23*  | 0.23*  | 0.2*  | 0.18*  | 0.18*  | 0.27* | 0.17   | 0.23*  | 0.22* | 0.28* | –     |    |
| 16. Healthcare professionals and scientists with concerns about the vaccine should have opportunities to share their opinions with the public         | 0.09*  | 0.01   | 0.1*   | 0.09*  | 0.05*  | 0.02   | 0.07*  | 0.11*  | 0.16*  | 0.12* | 0.1*   | 0.14*  | 0.38* | 0.13*  | 0.23*  | 0.33* | 0.37* | 0.25* | –  |

\* $p < 0.05$

Correlations Between Items and Subscale Score

| Item                                                                                                                                                  | Subscale |               |         |
|-------------------------------------------------------------------------------------------------------------------------------------------------------|----------|---------------|---------|
|                                                                                                                                                       | Safety   | Effectiveness | Freedom |
| 1. You can get COVID-19 from the vaccine itself (R)                                                                                                   | 0.68     |               |         |
| 2. There are toxic ingredients in the vaccine that can harm your health (R)                                                                           | 0.76     |               |         |
| 3. The vaccine can mess up your DNA (R)                                                                                                               | 0.73     |               |         |
| 4. The vaccine can cause infertility (R)                                                                                                              | 0.73     |               |         |
| 5. The vaccine can cause other diseases (R)                                                                                                           | 0.73     |               |         |
| 6. The fast production of the vaccine compromised its safety (R)                                                                                      | 0.69     |               |         |
| 7. The vaccine is going to be used by Governments as a tool to limit our civil rights (right of assembly, right of movement, right of religion, etc.) | 0.69     |               |         |

### Supplementary Material – Additional Psychometric Analyses

|                                                                                                                                               |      |      |
|-----------------------------------------------------------------------------------------------------------------------------------------------|------|------|
| 8. The vaccine will work in protecting me from getting COVID-19                                                                               | 0.80 |      |
| 9. By taking the vaccine I will protect my friends and family from getting COVID-19                                                           | 0.82 |      |
| 10. Everyone should get the vaccine to achieve herd immunity                                                                                  | 0.83 |      |
| 11. Getting COVID-19 is worse than experiencing potential side effects from the vaccine                                                       | 0.74 |      |
| 12. Natural remedies will not protect me from COVID-19                                                                                        | 0.69 |      |
| 17. Everybody should have equal access to the most effective and safe vaccine regardless of income, race, or immigration status               | 0.60 |      |
| 18. There is no elite group that will achieve financial power if people are getting vaccinated                                                | 0.60 |      |
| 19. There is no microchip with tracking capabilities inserted in the vaccine                                                                  | 0.71 |      |
| 13. People should be free to decide if they get vaccinated or not with no consequences for their job or personal life                         |      | 0.72 |
| 14. People should have the option to choose the vaccine brand they want                                                                       |      | 0.72 |
| 15. People should be allowed to live their life with no restrictions once vaccinated                                                          |      | 0.63 |
| 16. Healthcare professionals and scientists with concerns about the vaccine should have opportunities to share their opinions with the public |      | 0.69 |

### *Cronbach Alpha for Each Subscale by Country*

| Subscale                                       | Overall | US   | CA   | SWE  | IT   |
|------------------------------------------------|---------|------|------|------|------|
| Safety and Government Control (7 items)        | 0.84    | 0.89 | 0.88 | 0.81 | 0.73 |
| Effectiveness and Population Control (8 items) | 0.87    | 0.87 | 0.87 | 0.87 | 0.86 |
| Freedom (4 items)                              | 0.63    | 0.68 | 0.58 | 0.64 | 0.64 |

**Supplementary Material – Sample Descriptive Statistics**

| Sex    | <u>US</u> | <u>%</u> | <u>CA</u> | <u>%</u> | <u>SWE</u> | <u>%</u> | <u>IT</u> | <u>%</u> | <u>Total</u> | <u>%</u> |
|--------|-----------|----------|-----------|----------|------------|----------|-----------|----------|--------------|----------|
| Male   | 364       | 50%      | 491       | 50%      | 477        | 49%      | 489       | 50%      | 1,821        | 50%      |
| Female | 363       | 50%      | 494       | 50%      | 488        | 51%      | 497       | 50%      | 1,842        | 50%      |
| Total  | 727       |          | 985       |          | 965        |          | 986       |          | 3,663        |          |

| Education                 | <u>US</u> | <u>%</u> | <u>CA</u> | <u>%</u> | <u>SWE</u> | <u>%</u> | <u>IT</u> | <u>%</u> | <u>Total</u> | <u>%</u> |
|---------------------------|-----------|----------|-----------|----------|------------|----------|-----------|----------|--------------|----------|
| Less than high school     | 49        | 7%       | 49        | 5%       | 89         | 9%       | 83        | 8%       | 270          | 7%       |
| High school or equivalent | 162       | 22%      | 238       | 24%      | 463        | 48%      | 440       | 45%      | 1,303        | 36%      |
| Some college              | 140       | 19%      | 276       | 28%      | 161        | 17%      | 133       | 13%      | 710          | 19%      |
| Bachelor's degree         | 132       | 18%      | 296       | 30%      | 155        | 16%      | 277       | 28%      | 860          | 23%      |
| Post-graduate degree      | 221       | 30%      | 118       | 12%      | 85         | 9%       | 51        | 5%       | 475          | 13%      |
| Other                     | 22        | 3%       | 8         | 1%       | 12         | 1%       | 2         | 0%       | 44           | 1%       |
| Total                     | 726       |          | 985       |          | 965        |          | 986       |          | 3,662        |          |

| Work Category                         | <u>US</u> | <u>%</u> | <u>CA</u> | <u>%</u> | <u>SWE</u> | <u>%</u> | <u>IT</u> | <u>%</u> | <u>Total</u> | <u>%</u> |
|---------------------------------------|-----------|----------|-----------|----------|------------|----------|-----------|----------|--------------|----------|
| Healthcare or social worker           | 29        | 4%       | 55        | 6%       | 75         | 8%       | 35        | 4%       | 194          | 5%       |
| Residential facility                  | 17        | 2%       | 3         | 0%       | 33         | 3%       | 11        | 1%       | 64           | 2%       |
| Public health                         | 7         | 1%       | 11        | 1%       | 11         | 1%       | 16        | 2%       | 45           | 1%       |
| Correctional facility                 | 4         | 1%       | 7         | 1%       | 5          | 1%       | 5         | 1%       | 21           | 1%       |
| Vaccine manufacturing or distribution | 3         | 0%       | 3         | 0%       | 5          | 1%       | 2         | 0%       | 13           | 0%       |
| Pharmacy                              | 7         | 1%       | 13        | 1%       | 6          | 1%       | 9         | 1%       | 35           | 1%       |
| Teacher or school staff               | 24        | 3%       | 57        | 6%       | 63         | 7%       | 72        | 7%       | 216          | 6%       |
| Food processing                       | 10        | 1%       | 11        | 1%       | 11         | 1%       | 45        | 5%       | 77           | 2%       |
| Grocery store                         | 23        | 3%       | 49        | 5%       | 35         | 4%       | 37        | 4%       | 144          | 4%       |
| Postal and shipping                   | 5         | 1%       | 8         | 1%       | 15         | 2%       | 6         | 1%       | 34           | 1%       |
| Transportation                        | 15        | 2%       | 24        | 2%       | 57         | 6%       | 35        | 4%       | 131          | 4%       |
| Police or firefighter                 | 2         | 0%       | 8         | 1%       | 10         | 1%       | 24        | 2%       | 44           | 1%       |
| Volunteer                             | 37        | 5%       | 57        | 6%       | 23         | 2%       | 25        | 3%       | 142          | 4%       |
| Other                                 | 250       | 34%      | 579       | 59%      | 558        | 58%      | 664       | 67%      | 2,051        | 56%      |
| Multiple professions                  | 294       | 40%      | 100       | 10%      | 58         | 6%       | 0         | 0%       | 452          | 12%      |
| Total                                 | 727       |          | 985       |          | 965        |          | 986       |          | 3,663        |          |

## Supplementary Material – Survey Items

How much do you agree or disagree with the following statements?

|                                                                                                                                                           | Strongly disagree | Disagree | Somewhat disagree | Unsure | Somewhat agree | Agree | Strongly agree |
|-----------------------------------------------------------------------------------------------------------------------------------------------------------|-------------------|----------|-------------------|--------|----------------|-------|----------------|
| 1. You cannot get COVID-19 from the vaccine itself                                                                                                        |                   |          |                   |        |                |       |                |
| 2. There are no toxic ingredients in the vaccine that can harm your health                                                                                |                   |          |                   |        |                |       |                |
| 3. The vaccine cannot mess up your DNA                                                                                                                    |                   |          |                   |        |                |       |                |
| 4. The vaccine cannot cause infertility                                                                                                                   |                   |          |                   |        |                |       |                |
| 5. The vaccine cannot cause other diseases                                                                                                                |                   |          |                   |        |                |       |                |
| 6. The fast production of the vaccine did not compromise its safety                                                                                       |                   |          |                   |        |                |       |                |
| 7. The vaccine is not going to be used by Governments as a tool to limit our civil rights (right of assembly, right of movement, right of religion, etc.) |                   |          |                   |        |                |       |                |

How much do you agree or disagree with the following statements?

|                                                                                         | Strongly disagree | Disagree | Somewhat disagree | Unsure | Somewhat agree | Agree | Strongly agree |
|-----------------------------------------------------------------------------------------|-------------------|----------|-------------------|--------|----------------|-------|----------------|
| 8. The vaccine will work in protecting me from getting COVID-19                         |                   |          |                   |        |                |       |                |
| 9. By taking the vaccine I will protect my friends and family from getting COVID-19     |                   |          |                   |        |                |       |                |
| 10. Everyone should get the vaccine to achieve herd immunity                            |                   |          |                   |        |                |       |                |
| 11. Getting COVID-19 is worse than experiencing potential side effects from the vaccine |                   |          |                   |        |                |       |                |
| 12. Natural remedies will not protect me from COVID-19                                  |                   |          |                   |        |                |       |                |

How much do you agree or disagree with the following statements?

|                                                                                                                                               | Strongly disagree | Disagree | Somewhat disagree | Unsure | Somewhat agree | Agree | Strongly agree |
|-----------------------------------------------------------------------------------------------------------------------------------------------|-------------------|----------|-------------------|--------|----------------|-------|----------------|
| 13. People should be free to decide if they get vaccinated or not with no consequences for their job or personal life                         |                   |          |                   |        |                |       |                |
| 14. People should have the option to choose the vaccine brand they want                                                                       |                   |          |                   |        |                |       |                |
| 15. People should be allowed to live their life with no restrictions once vaccinated                                                          |                   |          |                   |        |                |       |                |
| 16. Healthcare professionals and scientists with concerns about the vaccine should have opportunities to share their opinions with the public |                   |          |                   |        |                |       |                |
| 17. Everybody should have equal access to the most effective and safe vaccine regardless of income, race, or immigration status               |                   |          |                   |        |                |       |                |
| 18. There is no elite group that will achieve financial power if people are getting vaccinated                                                |                   |          |                   |        |                |       |                |
| 19. There is no microchip with tracking capabilities inserted in the vaccine                                                                  |                   |          |                   |        |                |       |                |
